# Supplementary material
Source: publisher site journal article supplement (https://www.dovepress.com/article/222966)
Supplement: Supplementary file 1 [file get_supplementary_file.php]

Supplementary data

List of ethical committees

Ethical Committee of National Center of Neurology and Psychiatry

Ethical Committee of National Center for Geriatrics and Gerontology

Ethical Committee of University of Tsukuba Hospital

Ethical Committee of Teikyo University Hospital

Ethical Committee of Tokyo Medical University Hospital

Ethical Committee of Toho University Omori Medical Center

Ethical Committee of Nippon Medical School Musashi Kosugi Hospital

Ethical Committee of National Institute of Radiological Sciences

Ethical Committee of Toho University Sakura Medical Center

Ethical Committee of Yamagata University School of Medicine
